# Supplementary material for: Central-metal effect on intramolecular vibrational energy transfer of M(CO)5Br (M = Mn, Re) probed by two-dimensional infrared spectroscopy
Source: Royal Society of Chemistry journal article supplement (doi:10.1039/c7cp05117d), 2018-01-01
Supplement: c7cp05117d1.pdf [file c7cp05117d1.pdf]

## Supporting Information

**Central-metal effect on intramolecular vibrational energy transfer of  $M(\text{CO})_5\text{Br}$  ( $M = \text{Mn}, \text{Re}$ )  
probed by two-dimensional infrared spectroscopy**

*Fan Yang<sup>†\*</sup>, Xueqian Dong<sup>†‡</sup>, Minjun Feng<sup>†‡</sup>, Juan Zhao<sup>†‡\*</sup>, Jianping Wang<sup>†‡</sup>*

*<sup>†</sup> Beijing National Laboratory for Molecular Sciences; Molecular Reaction Dynamics Laboratory, CAS  
Research/Education Center for Excellence in Molecular Sciences, Institute of Chemistry, Chinese  
Academy of Sciences, Beijing, 100190, P. R. China*

*<sup>‡</sup> University of Chinese Academy of Sciences, Beijing 100049, P. R. China*

\*Author to whom correspondences should be addressed.

Tel: (+86)-010-62563565; Fax: (+86)-010-62563167; E-mail: yangfan@iccas.ac.cn,

zhaojuan@iccas.ac.cn

**Table S1.** Calculated harmonic frequencies ( $\omega$ , in  $\text{cm}^{-1}$ ), anharmonic frequencies ( $\nu$ , in  $\text{cm}^{-1}$ ) and transition intensities (I, in KM/mole) of the  $\text{C}\equiv\text{O}$  stretching modes in  $\text{Mn}(\text{CO})_5\text{Br}$  and  $\text{Re}(\text{CO})_5\text{Br}$  in gas phase.

| mode                          | $\text{Mn}(\text{CO})_5\text{Br}$ |        |                              |                           |        | $\text{Re}(\text{CO})_5\text{Br}$ |        |                              |                           |        |
|-------------------------------|-----------------------------------|--------|------------------------------|---------------------------|--------|-----------------------------------|--------|------------------------------|---------------------------|--------|
|                               | $\omega$                          | $\nu$  | $\Delta\omega_{\text{A1-E}}$ | $\Delta\nu_{\text{A1-E}}$ | I      | $\omega$                          | $\nu$  | $\Delta\omega_{\text{A1-E}}$ | $\Delta\nu_{\text{A1-E}}$ | I      |
| A <sub>1</sub>                | 2090.8                            | 2064.9 | 39.0                         | 39.3                      | 817.4  | 2060.2                            | 2032.1 | 52.1                         | 54.5                      | 1034.7 |
| E                             | 2129.8                            | 2104.2 |                              |                           | 1275.9 | 2112.3                            | 2086.6 |                              |                           | 1614.0 |
| E                             | 2129.8                            | 2104.2 |                              |                           | 1275.9 | 2112.3                            | 2086.6 |                              |                           | 1614.0 |
| B <sub>2</sub>                | 2144.6                            | 2117.8 |                              |                           | 0      | 2142.3                            | 2115.3 |                              |                           | 0      |
| A <sub>1</sub> <sup>(2)</sup> | 2198.0                            | 2169.8 |                              |                           | 87.9   | 2212.2                            | 2182.6 |                              |                           | 38.7   |

**Table S2.** Calculated harmonic frequencies ( $\omega$ ,  $\text{cm}^{-1}$ ) and transition intensities (I, in KM/mole) of all vibrations of  $\text{Mn}(\text{CO})_5\text{Br}$  in gas phase and in two implicit solvents using PCM solvent model.

| mode                          | gas      |         | $\text{CCl}_4$ |         | DMSO     |         |
|-------------------------------|----------|---------|----------------|---------|----------|---------|
|                               | $\omega$ | I       | $\omega$       | I       | $\omega$ | I       |
| B <sub>2</sub>                | 71.2     | 0.00    | 61.5           | 0.00    | 64.0     | 0.00    |
| E                             | 71.2     | 0.38    | 67.8           | 0.60    | 68.1     | 1.00    |
| E                             | 71.2     | 0.38    | 67.8           | 0.60    | 68.1     | 1.00    |
| E                             | 96.1     | 0.00    | 93.4           | 0.04    | 93.9     | 0.18    |
| E                             | 96.1     | 0.00    | 93.4           | 0.04    | 93.9     | 0.18    |
| B <sub>1</sub>                | 100.2    | 0.00    | 100.3          | 0.00    | 101.1    | 0.00    |
| A <sub>1</sub>                | 113.4    | 1.14    | 112.0          | 1.8     | 109.4    | 3.02    |
| E                             | 116.3    | 1.67    | 116.3          | 2.17    | 117.5    | 2.92    |
| E                             | 116.3    | 1.67    | 116.3          | 2.17    | 117.5    | 2.92    |
| A <sub>1</sub>                | 220.5    | 8.78    | 215.2          | 13.6    | 206.1    | 22.38   |
| A <sub>2</sub>                | 368.9    | 0.00    | 363.5          | 0.00    | 362.7    | 0.00    |
| A <sub>1</sub>                | 374.9    | 0.59    | 373.3          | 0.76    | 372.1    | 0.89    |
| B <sub>2</sub>                | 381.9    | 0.00    | 377.7          | 0.00    | 375.1    | 0.00    |
| E                             | 412.7    | 17.96   | 406.6          | 21.26   | 403.8    | 41.65   |
| E                             | 412.7    | 17.96   | 406.6          | 21.26   | 403.8    | 41.65   |
| E                             | 424.5    | 14.67   | 419.6          | 24.59   | 417.2    | 29.60   |
| E                             | 424.5    | 14.67   | 419.6          | 24.59   | 417.2    | 29.60   |
| A <sub>1</sub>                | 475.9    | 0.43    | 470.4          | 1.17    | 463.5    | 2.08    |
| B <sub>2</sub>                | 513.8    | 0.00    | 507.9          | 0.00    | 513.3    | 0.00    |
| B <sub>1</sub>                | 563.3    | 0.00    | 560.1          | 0.00    | 513.3    | 0.00    |
| E                             | 566.8    | 1.31    | 560.1          | 1.88    | 558.4    | 4.02    |
| E                             | 566.8    | 1.31    | 560.1          | 1.88    | 558.4    | 4.02    |
| E                             | 664.7    | 127.41  | 659.7          | 166.07  | 652.1    | 240.42  |
| E                             | 664.7    | 127.41  | 659.7          | 166.07  | 652.1    | 240.42  |
| A <sub>1</sub>                | 669.7    | 188.30  | 664.8          | 245.01  | 658.3    | 338.84  |
| A <sub>1</sub>                | 2090.8   | 817.32  | 2081.3         | 1053.72 | 2076.0   | 1367.92 |
| E                             | 2129.8   | 1275.89 | 2119.4         | 1657.43 | 2104.8   | 2315.25 |
| E                             | 2129.8   | 1275.89 | 2119.4         | 1657.43 | 2104.8   | 2315.25 |
| B <sub>2</sub>                | 2144.7   | 0.00    | 2137.7         | 0.00    | 2129.9   | 0.00    |
| A <sub>1</sub> <sup>(2)</sup> | 2198.0   | 87.92   | 2197.3         | 125.29  | 2196.7   | 181.53  |

**Table S3.** Calculated harmonic frequencies ( $\omega$ ,  $\text{cm}^{-1}$ ) and transition intensities (I, in KM/mole) of all vibrations of  $\text{Re}(\text{CO})_5\text{Br}$  in gas phase and in two implicit solvents using PCM solvent model.

| mode                          | gas      |         | $\text{CCl}_4$ |         | DMSO     |         |
|-------------------------------|----------|---------|----------------|---------|----------|---------|
|                               | $\omega$ | I       | $\omega$       | I       | $\omega$ | I       |
| B <sub>2</sub>                | 65.6     | 0.00    | 63.8           | 0.00    | 64.1     | 0.00    |
| E                             | 65.8     | 0.03    | 64.9           | 0.08    | 64.5     | 0.27    |
| E                             | 65.8     | 0.03    | 64.9           | 0.08    | 64.5     | 0.27    |
| E                             | 88.8     | 0.01    | 89.1           | 0.00    | 89.1     | 0.00    |
| E                             | 88.8     | 0.01    | 89.1           | 0.00    | 89.1     | 0.00    |
| A <sub>1</sub>                | 94.1     | 0.35    | 94.2           | 0.58    | 93.0     | 0.88    |
| B <sub>1</sub>                | 95.9     | 0.00    | 97.9           | 0.00    | 98.2     | 0.00    |
| E                             | 101.9    | 0.71    | 103.3          | 0.90    | 104.5    | 1.12    |
| E                             | 101.9    | 0.71    | 103.3          | 0.90    | 104.5    | 1.12    |
| A <sub>1</sub>                | 201.1    | 7.50    | 196.1          | 11.3    | 188.3    | 18.3    |
| E                             | 361.9    | 63.11   | 357.2          | 89.6    | 351.1    | 139.00  |
| E                             | 361.9    | 63.11   | 357.2          | 89.6    | 351.1    | 139.00  |
| A <sub>2</sub>                | 376.0    | 0.00    | 372.7          | 0.00    | 373.2    | 0.00    |
| E                             | 427.6    | 0.30    | 424.6          | 0.49    | 422.66   | 0.89    |
| E                             | 427.6    | 0.30    | 424.6          | 0.49    | 422.66   | 0.89    |
| B <sub>2</sub>                | 434.9    | 0.00    | 431.7          | 0.00    | 430.3    | 0.00    |
| A <sub>1</sub>                | 448.3    | 1.96    | 447.3          | 3.14    | 445.6    | 5.59    |
| A <sub>1</sub>                | 490.3    | 3.83    | 491.3          | 5.72    | 490.1    | 7.93    |
| B <sub>1</sub>                | 518.8    | 0.00    | 519.3          | 0.00    | 516.3    | 0.00    |
| B <sub>2</sub>                | 546.6    | 0.00    | 546.3          | 0.00    | 548.7    | 0.00    |
| E                             | 570.8    | 0.05    | 570.5          | 0.34    | 569.9    | 1.47    |
| E                             | 570.8    | 0.05    | 570.5          | 0.34    | 569.9    | 1.47    |
| E                             | 613.2    | 68.66   | 611.6          | 89.3    | 607.6    | 135.6   |
| E                             | 613.2    | 68.66   | 611.6          | 89.3    | 607.6    | 135.6   |
| A <sub>1</sub>                | 620.7    | 116.29  | 619.2          | 154.7   | 616.2    | 227.69  |
| A <sub>1</sub>                | 2060.2   | 817.32  | 2044.8         | 1389.36 | 2030.2   | 1927.46 |
| E                             | 2112.3   | 1614.03 | 2099.0         | 2169.51 | 2079.2   | 3165.58 |
| E                             | 2112.3   | 1614.03 | 2099.0         | 2169.51 | 2079.2   | 3165.58 |
| B <sub>2</sub>                | 2142.3   | 0.00    | 2134.0         | 0.00    | 2124.2   | 0.00    |
| A <sub>1</sub> <sup>(2)</sup> | 2212.1   | 38.66   | 2211.8         | 57.65   | 2210.2   | 83.84   |

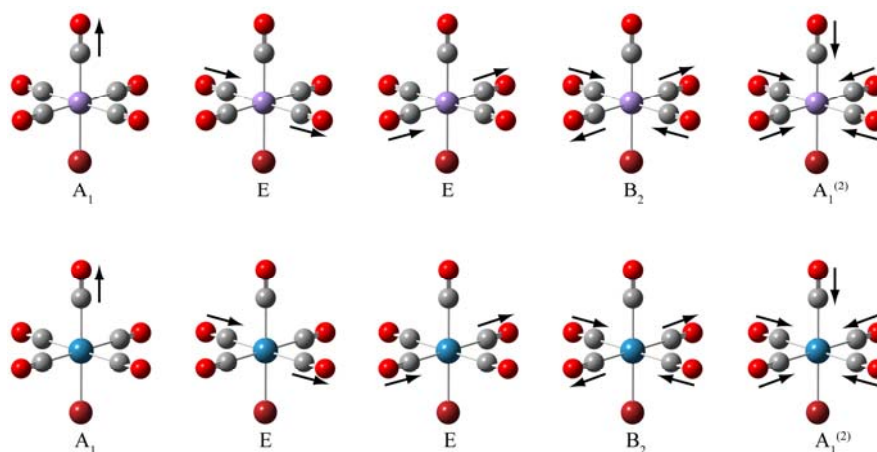

**Figure S1.** The C≡O stretching normal modes of Mn(CO)<sub>5</sub>Br (Top) and Re(CO)<sub>5</sub>Br (Bottom) for comparison and are arranged from low- to high-frequency in vibration (from left to right). Their vibrational frequencies are listed in Table S1.

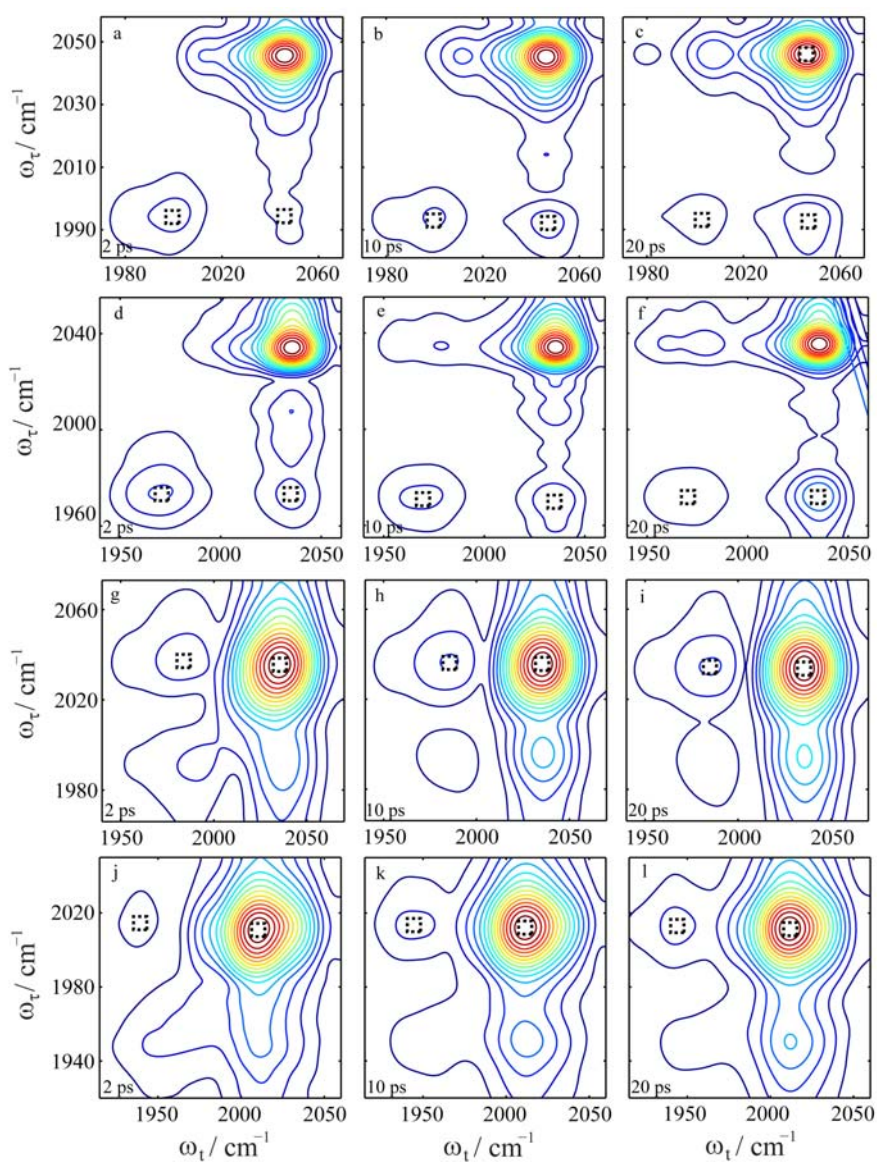

**Figure S2.** Representative waiting time-dependent absolute non-rephasing 2D IR spectra of  $\text{Mn}(\text{CO})_5\text{Br}$  in  $\text{CCl}_4$  (a-c),  $\text{Re}(\text{CO})_5\text{Br}$  in  $\text{CCl}_4$  (d-f),  $\text{Mn}(\text{CO})_5\text{Br}$  in DMSO (g-i) and  $\text{Re}(\text{CO})_5\text{Br}$  in DMSO (j-l) in the frequency region of the CO stretching.  $T_w$  (2 ps, 10 ps and 20 ps) from left to right are marked in each case.

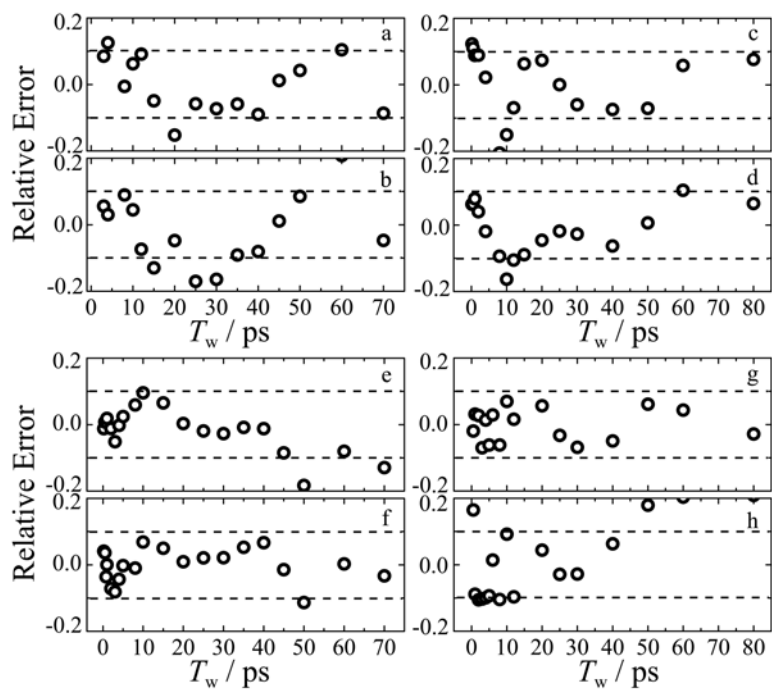

**Figure S3.** Ratio of residual and peak amplitude obtained in Fig. 3 as a function of the waiting time. Dashed lines indicate  $\pm 10\%$  limit.
